# Supplementary material for: Pd-catalyzed cross-coupling of aromatic compounds with carboxylic acids via C–H bond activation
Source: Royal Society of Chemistry journal article supplement (doi:10.1039/c5qo00003c), 2015-01-01

## **Pd-Catalyzed Cross-Coupling of Aromatic Compounds with Carboxylic Acids via C-H Bond Activation**

Junliang Wu, Kim Le Mai Hoang, Minli Leow, Xue-Wei Liu\*

Division of Chemistry and Biological Chemistry, School of Physical & Mathematical Sciences,  
Nanyang Technological University, 21 Nanyang Link, Singapore 637371

E-mail: [Xuewei@ntu.edu.sg](mailto:Xuewei@ntu.edu.sg).

## Contents

|                                             |    |
|---------------------------------------------|----|
| General considerations.....                 | 3  |
| Experimental procedure.....                 | 4  |
| General coupling procedure.....             | 4  |
| Characterization data for the products..... | 4  |
| KIE experiment.....                         | 10 |
| References.....                             | 10 |
| NMR spectra of the isolated products .....  | 11 |

## General considerations

Unless otherwise specified, all reactions were carried out under air atmosphere. The reagents and solvents were directly used from Sigma-Aldrich, Alfa Aesar and TCI without further purification unless noted. Reactions were monitored through thin layer chromatography [Merck 60 F254 precoated silica gel plate (0.2 mm thickness)]. Subsequent to elution, spots were visualized using UV radiation (254 nm) on Spectroline Model ENF-24061/F 254 nm. Flash chromatography was performed using silica gel 60 with distilled solvents. HRMS spectra were recorded on a Waters Q-Tofermier TM mass Spectrometer.  $^1\text{H}$  NMR and  $^{13}\text{C}$  NMR spectra were recorded using Bruker Avance 400 MHz spectrometers. Chemical shifts for  $^1\text{H}$  NMR spectra are reported as  $\delta$  in units of parts per million (ppm) downfield from  $\text{SiMe}_4$  ( $\delta$  0.0) and relative to the signal of chloroform-d ( $\delta$  7.260, singlet). Multiplicities were given as: s (singlet); d (doublet); t (triplet); q (quartet); dd (doublets of doublet); td (triplet of doublet); m (multiplets) and etc. Coupling constants are reported as a J value in Hz. Carbon nuclear magnetic resonance spectra ( $^{13}\text{C}$  NMR) are reported as  $\delta$  in units of parts per million (ppm) downfield from  $\text{SiMe}_4$  ( $\delta$  0.0) and relative to the signal of chloroform-d ( $\delta$  77.00, triplet). Compound numbers used in the experimental section correspond to those employed in the main paper.

## Experimental Procedure

### General coupling procedure (Table 2)

#### Condition A

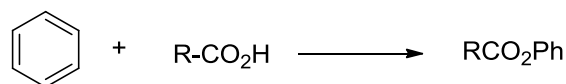

0.5 mmol carboxylic acid, 1 mmol iodosobenzene and 5mol% Pd(OAc)<sub>2</sub> and 2 mL benzene were added into the Schlenk tube. The mixture was stirred at 120 °C for 40 h and cooled down to room temperature, quenched with saturated sodium bicarbonate solution (50 mL) and extracted thrice with ethyl acetate (30 mL) and the combined organic phase was dried over Na<sub>2</sub>SO<sub>4</sub>. After evaporation of the solvents the residue was purified by silica gel chromatography or thin layer chromatography (TLC).

#### Condition B

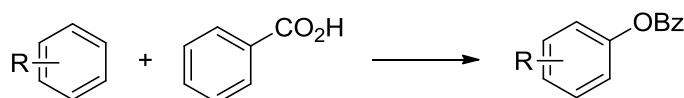

0.5 mmol benzoic acid, 1 mmol aromatic compound, 1mmol iodosobenzene, 0.75 mmol CSA and 2 mL DCE were added into the Schlenk tube. The mixture was heated at 120 °C for 40 h and cooled down to room temperature, quenched with saturated sodium bicarbonate solution (50 mL) and extracted thrice with ethyl acetate (30 mL) and the combined organic phase was dried over Na<sub>2</sub>SO<sub>4</sub>. After evaporation of the solvents the residue was purified by silica gel chromatography or thin layer chromatography (TLC).

#### Phenyl benzoate 3a<sup>1</sup>

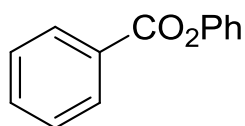

White solid: <sup>1</sup>H NMR (400 MHz, CDCl<sub>3</sub>) ppm: 8.21 (d, *J* = 7.20 Hz, 2H), 7.64 (t, *J* = 7.60 Hz, 1H), 7.51 (t, *J* = 7.60 Hz, 2H), 7.43 (t, *J* = 7.60 Hz, 2H), 7.27 (t, *J* = 7.60 Hz,

1H), 7.23 (d,  $J = 7.60$  Hz, 2H).  $^{13}\text{C}$  NMR (100 MHz,  $\text{CDCl}_3$ ): 165.17, 150.98, 133.55, 130.16, 129.61, 129.48, 128.56, 125.87, 121.71. HRMS (ESI) Calcd. for  $\text{C}_{13}\text{H}_{10}\text{O}_2$ :  $[\text{M}+\text{H}]^+$ , 199.0759. Found:  $m/z$  199.0760.

### Phenyl 4-chlorobenzoate **3b**<sup>2</sup>

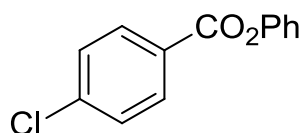

White solid:  $^1\text{H}$  NMR (400 MHz,  $\text{CDCl}_3$ ) ppm: 8.14 (d,  $J = 8.80$  Hz, 2H), 7.49 (d,  $J = 8.80$  Hz, 2H), 7.44 (t,  $J = 7.60$  Hz, 2H), 7.29 (t,  $J = 7.60$  Hz, 1H), 7.21 (d,  $J = 8.40$  Hz, 2H).  $^{13}\text{C}$  NMR (100 MHz,  $\text{CDCl}_3$ ): 164.31, 150.77, 140.11, 131.52, 129.52, 128.93, 128.03, 126.02, 121.59. HRMS (ESI) Calcd. for  $\text{C}_{13}\text{H}_9\text{ClO}_2$ :  $[\text{M}+\text{H}]^+$ , 233.0369. Found:  $m/z$  233.0372.

### Phenyl 4-fluorobenzoate **3c**<sup>2</sup>

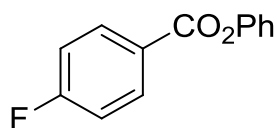

Pale yellow solid:  $^1\text{H}$  NMR (400 MHz,  $\text{CDCl}_3$ ) ppm: 8.25-8.22 (m, 2H), 7.44 (t,  $J = 7.60$  Hz, 2H), 7.29 (t,  $J = 7.20$  Hz, 1H), 7.23-7.17 (m, 4H).  $^{13}\text{C}$  NMR (100 MHz,  $\text{CDCl}_3$ ): 167.41, 164.88, 164.19, 150.83, 132.82, 129.51, 125.84, 121.64, 115.88.  $^{19}\text{F}$  NMR (100 MHz,  $\text{CDCl}_3$ ): -104.45. HRMS (ESI) Calcd. for  $\text{C}_{13}\text{H}_9\text{FO}_2$ :  $[\text{M}+\text{H}]^+$ , 217.0665. Found:  $m/z$  217.0666.

### Phenyl 2-bromobenzoate **3d**

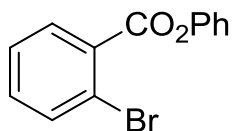

Yellow oil:  $^1\text{H}$  NMR (400 MHz,  $\text{CDCl}_3$ ) ppm: 8.00 (dd,  $J = 7.60$  Hz, 2.00 Hz, 1H), 7.74 (dd,  $J = 7.60$  Hz, 1.20 Hz, 1H), 7.47-7.38 (m, 4H), 7.31-7.26 (m, 3H).  $^{13}\text{C}$  NMR (100 MHz,  $\text{CDCl}_3$ ): 164.56, 150.67, 134.59, 133.10, 131.76, 131.44, 129.52, 127.30, 126.11, 122.23, 121.55. HRMS (ESI) Calcd. for  $\text{C}_{13}\text{H}_9\text{BrO}_2$ :  $[\text{M}+\text{H}]^+$ , 276.9864. Found:  $m/z$  276.9857.

### Phenyl isonicotinate **3e**<sup>3</sup>

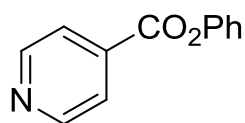

White solid: <sup>1</sup>H NMR (400 MHz, CDCl<sub>3</sub>) ppm: 8.67 (s, 2H), 7.64 (d, *J* = 6.80 Hz, 2H), 7.52-7.44 (m, 5H). <sup>13</sup>C NMR (100 MHz, CDCl<sub>3</sub>): 150.23, 148.41, 138.16, 129.12, 129.06, 127.00, 121.68. HRMS (ESI) Calcd. for C<sub>12</sub>H<sub>9</sub>NO<sub>2</sub>: [M+H]<sup>+</sup>, 200.0712. Found: m/z 200.0709.

### Phenyl nicotinate **3f**<sup>3</sup>

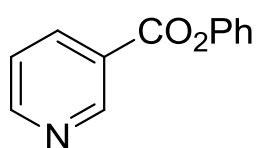

Pale yellow oil: <sup>1</sup>H NMR (400 MHz, CDCl<sub>3</sub>) ppm: 9.37 (s, 1H), 8.85-8.83 (m, 1H), 8.46-8.41 (m, 1H), 7.47-7.41 (m, 3H), 7.30-7.21 (m, 3H). <sup>13</sup>C NMR (100 MHz, CDCl<sub>3</sub>): 163.81, 153.95, 151.32, 150.48, 137.50, 129.55, 126.18, 125.55, 123.41, 121.50. HRMS (ESI) Calcd. for C<sub>12</sub>H<sub>9</sub>NO<sub>2</sub>: [M+H]<sup>+</sup>, 200.0712. Found: m/z 200.0709.

### Phenyl picolinate **3g**<sup>3</sup>

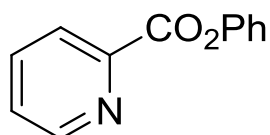

Yellow solid: <sup>1</sup>H NMR (400 MHz, CDCl<sub>3</sub>) ppm: 8.70 (d, *J* = 4.80 Hz, 1H), 8.00 (d, *J* = 6.80 Hz, 2H), 7.76-7.72 (m, 2H), 7.50-7.40 (m, 3H), 7.25-7.22 (m, 1H). <sup>13</sup>C NMR (100 MHz, CDCl<sub>3</sub>): 157.48, 149.66, 139.39, 136.74, 128.94, 128.73, 126.90, 122.08, 120.56. HRMS (ESI) Calcd. for C<sub>12</sub>H<sub>9</sub>NO<sub>2</sub>: [M+H]<sup>+</sup>, 200.0712. Found: m/z 200.0709.

### Phenyl 4-nitrobenzoate **3h**<sup>4</sup>

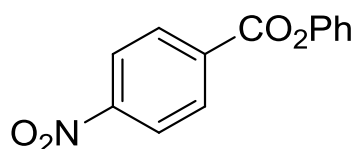

Pale yellow solid: <sup>1</sup>H NMR (400 MHz, CDCl<sub>3</sub>) ppm: 8.43-8.38 (m, 4H), 7.50 (t, *J* = 7.60 Hz, 2H), 7.35 (t, *J* = 7.20 Hz, 1H), 7.28 (d, *J* = 8.80 Hz, 2H). <sup>13</sup>C NMR (100

MHz, CDCl<sub>3</sub>): 163.29, 150.88, 150.49, 134.96, 131.26, 129.65, 126.38, 123.69, 121.38. HRMS (ESI) Calcd. for C<sub>13</sub>H<sub>9</sub>NO<sub>4</sub>: [M+H]<sup>+</sup>, 244.0610. Found: m/z 244.0609.

### Phenyl 2-methylbenzoate **3i**<sup>5</sup>

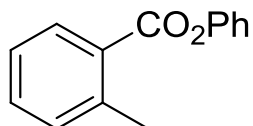

Pale yellow oil: <sup>1</sup>H NMR (400 MHz, CDCl<sub>3</sub>) ppm: 8.17 (d, *J* = 7.60 Hz, 1H), 7.51-7.43 (m, 3H), 7.35-7.28 (m, 3H), 7.23-7.21 (m, 2H), 2.69 (s, 3H). <sup>13</sup>C NMR (100 MHz, CDCl<sub>3</sub>): 165.83, 150.92, 141.30, 132.69, 131.95, 131.15, 129.47, 128.57, 125.90, 125.80, 121.82, 21.93. HRMS (ESI) Calcd. for C<sub>14</sub>H<sub>12</sub>O<sub>2</sub>: [M+H]<sup>+</sup>, 213.0916. Found: m/z 213.0920.

### Phenyl 4-methoxybenzoate **3j**<sup>6</sup>

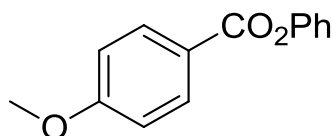

Pale yellow solid: <sup>1</sup>H NMR (400 MHz, CDCl<sub>3</sub>) ppm: 8.17 (d, *J* = 9.20 Hz, 2H), 7.43 (t, *J* = 7.20 Hz, 2H), 7.27 (t, *J* = 7.20 Hz, 1H), 7.21 (d, *J* = 8.40 Hz, 2H), 6.99 (d, *J* = 9.20 Hz, 2H), 3.90 (s, 3H). <sup>13</sup>C NMR (100 MHz, CDCl<sub>3</sub>): 164.87, 163.86, 151.05, 132.25, 129.39, 125.67, 121.86, 121.77, 113.80, 55.47. HRMS (ESI) Calcd. for C<sub>14</sub>H<sub>12</sub>O<sub>3</sub>: [M+H]<sup>+</sup>, 229.0865. Found: m/z 229.0869.

### Phenyl 1-methyl indole-3-carboxylate **3l**<sup>7</sup>

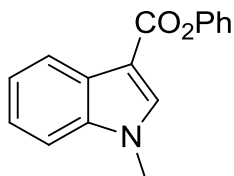

Colorless oil: <sup>1</sup>H NMR (400 MHz, CDCl<sub>3</sub>) ppm: 8.29-8.27 (m, 1H), 8.27 (s, 1H), 7.48-7.26 (m, 8H), 3.85 (s, 3H). <sup>13</sup>C NMR (100 MHz, CDCl<sub>3</sub>): 163.07, 150.92, 137.26, 136.07, 129.31, 126.73, 125.37, 123.01, 122.19, 122.02, 121.62, 109.89, 105.99, 33.45. HRMS (ESI) Calcd. for C<sub>16</sub>H<sub>13</sub>NO<sub>2</sub>: [M+H]<sup>+</sup>, 252.1024. Found: m/z 252.1020.

### 3-Bromo-4-methoxyphenyl benzoate **3m**

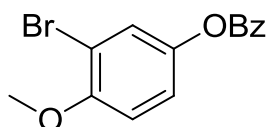

Pale yellow solid:  $^1\text{H}$  NMR (400 MHz,  $\text{CDCl}_3$ ) ppm: 8.18 (d,  $J = 8.00$  Hz, 2H), 7.64 (t,  $J = 7.20$  Hz, 1H), 7.51 (t,  $J = 7.60$  Hz, 2H), 7.45 (d,  $J = 2.40$  Hz, 1H), 7.16 (dd,  $J = 8.80$  Hz, 2.40 Hz, 1H), 6.94 (d,  $J = 8.80$  Hz, 1H), 3.92 (s, 3H).  $^{13}\text{C}$  NMR (100 MHz,  $\text{CDCl}_3$ ): 165.17, 153.95, 144.40, 133.70, 130.16, 129.23, 128.60, 126.71, 121.45, 111.95, 111.59, 56.61. HRMS (ESI) Calcd. for  $\text{C}_{14}\text{H}_{11}\text{BrO}_3$ :  $[\text{M}+\text{H}]^+$ , 306.9970. Found:  $m/z$  306.9972.

### 3-chloro-4-methoxyphenyl benzoate 3n

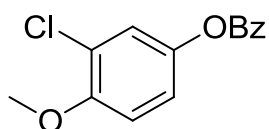

White solid:  $^1\text{H}$  NMR (400 MHz,  $\text{CDCl}_3$ ) ppm: 8.18 (d,  $J = 7.20$  Hz, 2H), 7.64 (t,  $J = 7.60$  Hz, 1H), 7.51 (t,  $J = 8.00$  Hz, 2H), 7.29 (d,  $J = 2.80$  Hz, 1H), 7.12 (dd,  $J = 8.80$  Hz, 2.80 Hz, 1H), 6.96 (d,  $J = 8.80$  Hz, 1H), 3.92 (s, 3H).  $^{13}\text{C}$  NMR (100 MHz,  $\text{CDCl}_3$ ): 165.18, 153.06, 144.14, 133.72, 130.16, 129.22, 128.60, 123.81, 122.78, 120.74, 112.18, 56.50. HRMS (ESI) Calcd. for  $\text{C}_{14}\text{H}_{11}\text{ClO}_3$ :  $[\text{M}+\text{H}]^+$ , 263.0475. Found:  $m/z$  263.0471.

### 3-Iodo-4-methoxyphenyl benzoate 3o

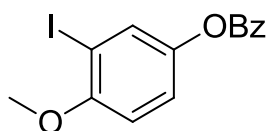

Pale yellow solid:  $^1\text{H}$  NMR (400 MHz,  $\text{CDCl}_3$ ) ppm: 8.18 (dd,  $J = 8.40$  Hz, 1.2 Hz, 2H), 7.66-7.62 (m, 2H), 7.51 (t,  $J = 8.00$  Hz, 2H), 7.20 (dd,  $J = 8.80$  Hz, 2.80 Hz, 1H), 6.85 (d,  $J = 8.80$  Hz, 1H), 3.90 (s, 3H).  $^{13}\text{C}$  NMR (100 MHz,  $\text{CDCl}_3$ ): 165.20, 156.16, 144.63, 133.68, 132.44, 130.13, 129.21, 128.58, 122.42, 110.67, 85.31, 56.75. HRMS (ESI) Calcd. for  $\text{C}_{14}\text{H}_{11}\text{IO}_3$ :  $[\text{M}+\text{H}]^+$ , 354.9831. Found:  $m/z$  354.9831.

### 4-Methoxyphenyl benzoate 3p<sup>2</sup>



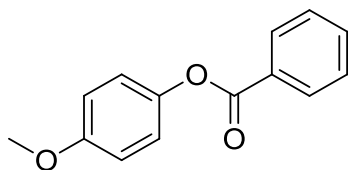

White solid:  $^1\text{H}$  NMR (400 MHz,  $\text{CDCl}_3$ ) ppm: 8.22 (dd,  $J = 8.00$  Hz, 1.6 Hz, 2H), 7.64 (t,  $J = 7.60$  Hz, 1H), 7.51 (t,  $J = 8.00$  Hz, 2H), 7.14 (d,  $J = 8.80$  Hz, 2H), 6.95 (d,  $J = 9.20$  Hz, 2H), 3.83 (s, 3H).  $^{13}\text{C}$  NMR (100 MHz,  $\text{CDCl}_3$ ): 165.49, 157.30, 144.42, 133.45, 130.10, 129.65, 128.50, 122.41, 114.50, 55.58. HRMS (ESI) Calcd. for  $\text{C}_{14}\text{H}_{12}\text{O}_3$ :  $[\text{M}+\text{H}]^+$ , 229.0865. Found:  $m/z$  229.0869.

### 2, 4, 6-Trimethoxyphenyl benzoate **3q**<sup>8</sup>

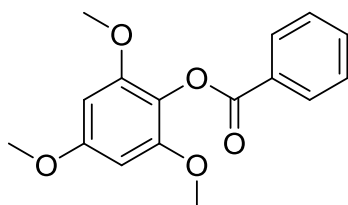

Yellow solid:  $^1\text{H}$  NMR (400 MHz,  $\text{CDCl}_3$ ) ppm: 8.24 (d,  $J = 7.20$  Hz, 2H), 7.61 (t,  $J = 7.20$  Hz, 1H), 7.50 (t,  $J = 8.00$  Hz, 2H), 6.23 (s, 2H), 3.82 (2, 3H), 3.79 (s, 6H).  $^{13}\text{C}$  NMR (100 MHz,  $\text{CDCl}_3$ ): 164.79, 158.27, 152.74, 133.20, 130.28, 129.46, 128.35, 122.80, 91.45, 56.06, 55.49. HRMS (ESI) Calcd. for  $\text{C}_{16}\text{H}_{16}\text{O}_5$ :  $[\text{M}+\text{H}]^+$ , 289.1076. Found:  $m/z$  289.1067.

### 1-Methyl-1H-indol-3-yl benzoate **3s**

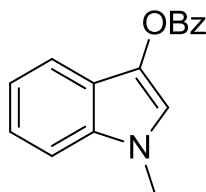

White solid:  $^1\text{H}$  NMR (400 MHz,  $\text{CDCl}_3$ ) ppm: 8.30-8.28 (m, 2H), 7.69-7.63(m, 2H), 7.55 (t,  $J = 8.00$  Hz, 2H), 7.45 (s, 1H), 7.34 (d,  $J = 8.00$  Hz, 1H), 7.30-7.26 (m, 1H), 7.19-7.15 (m, 1H), 3.80 (s, 3H).  $^{13}\text{C}$  NMR (100 MHz,  $\text{CDCl}_3$ ): 164.22, 133.73, 133.33, 130.04, 129.71, 129.25, 128.55, 122.36, 120.26, 119.33, 118.02, 117.61, 109.28, 32.86. HRMS (ESI) Calcd. for  $\text{C}_{16}\text{H}_{13}\text{NO}_2$ :  $[\text{M}+\text{H}]^+$ , 252.1025. Found:  $m/z$  252.1023.

### Phenyl phenylacetate **3t**<sup>9</sup>

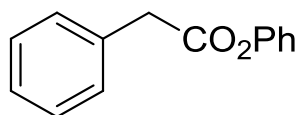

White solid:  $^1\text{H}$  NMR (400 MHz,  $\text{CDCl}_3$ ) ppm: 7.42-7.32 (m, 7H), 7.24 (m, 1H), 7.06 (d,  $J = 8.40$  Hz, 2H), 3.87 (s, 2H).  $^{13}\text{C}$  NMR (100 MHz,  $\text{CDCl}_3$ ): 169.96, 150.72, 133.45, 129.35, 129.28, 127.32, 125.82, 121.41, 41.42. HRMS (ESI) Calcd. for  $\text{C}_{14}\text{H}_{12}\text{O}_2$ :  $[\text{M}+\text{H}]^+$ , 213.0916. Found:  $m/z$  213.0920.

### KIE experiment

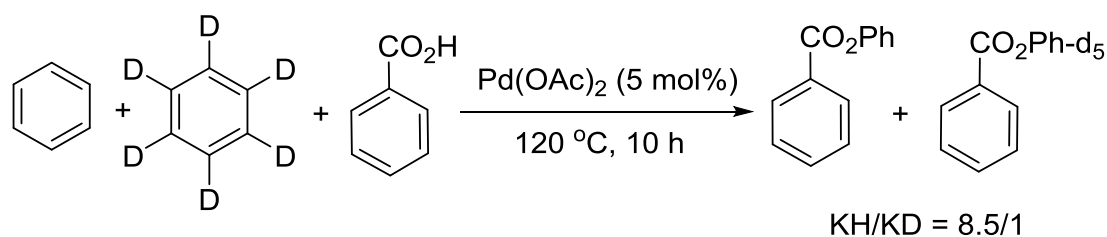

0.5 mmol carboxylic acid, 1 mmol iodobenzene and 5mol%  $\text{Pd}(\text{OAc})_2$ , 0.5 mL benzene and 0.5 mL benzene- $\text{d}_6$  were added into the Schlenk tube. The mixture was stirred at 120 °C for 10 h and cooled down to room temperature, quenched with saturated sodium bicarbonate solution (50 mL) and extracted thrice with ethyl acetate (30 mL) and the combined organic phase was dried over  $\text{Na}_2\text{SO}_4$ . After evaporation of the solvents the residue was purified by silica gel chromatography.

### References

1. Z. Liu, Q. Ma, Y. Liu and Q. Wang, *Org. Lett.*, 2014, **16**, 236.
2. W. Yin, H. He, Y. Zhang and T. Long, *Chem. Asian J.* 2014, **9**, 2402.
3. K. Amaike, K. Muto, J. Yamaguchi and K. Itami, *J. Am. Chem. Soc.* 2012, **134**, 13573.
4. T. Yokozawa, M. Ogawa, A. Sekino, R. Sugi and A. Yokoyama. *J. Am. Chem. Soc.* 2002, **124**, 15158.
5. T. Ueda, H. Konishi and K. Manabe, *Org. Lett.*, 2012, **14**, 3100.
6. J. Meng, M. Gao, Y. Wei and W. Zhang, *Chem. Asian J.* 2012, **7**, 872.
7. J. Wu, J. Lan, S. Guo and J. You, *Org. Lett.*, 2014, **16**, 5862.
8. H. Rao, P. Wang and C. Li, *Eur. J. Org. Chem.* 2012, **33**, 6503.

9. L. Zhang, G. Zhang, M. Zhang and J. Cheng. *J. Org. Chem.*, 2010, **75**, 7472.

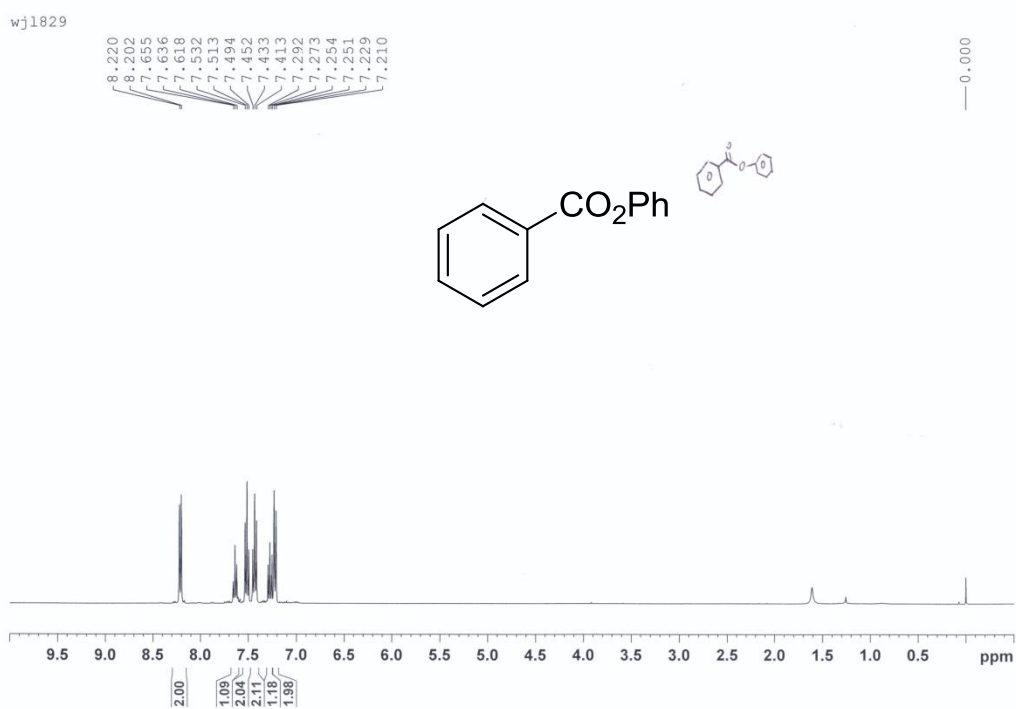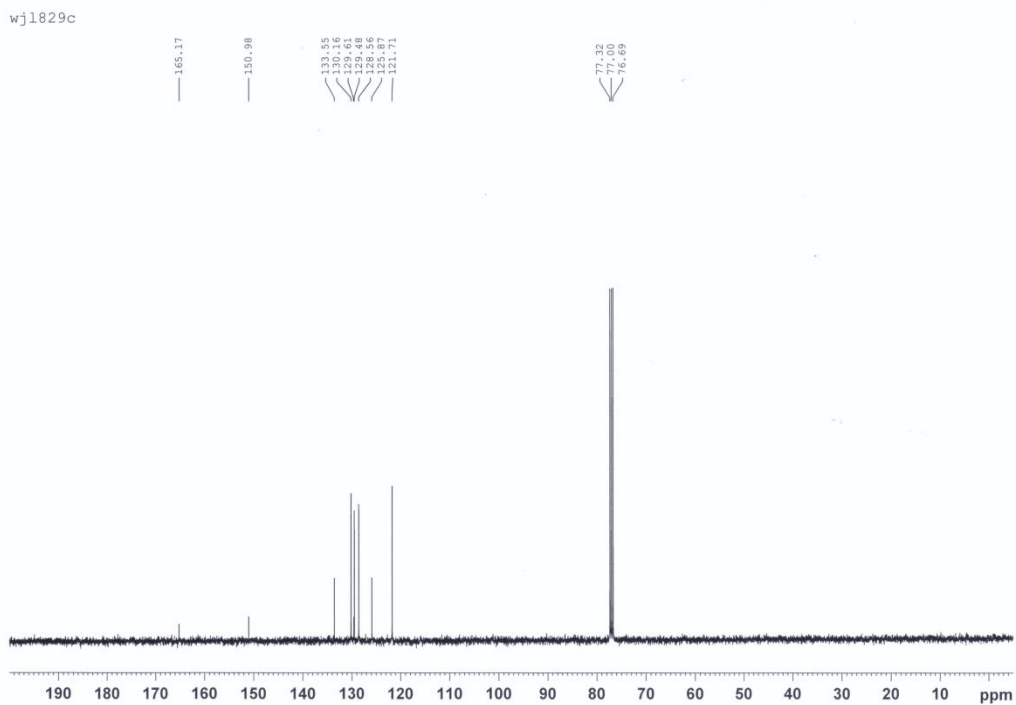

wj1-3b

8.158  
8.136  
7.505  
7.483  
7.461  
7.442  
7.422  
7.307  
7.288  
7.270  
7.259  
7.228  
7.225  
7.206  
7.204

0.011

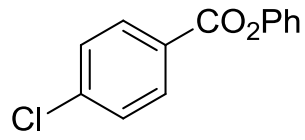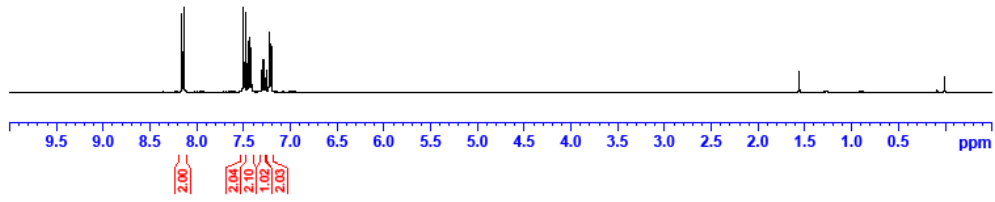

wj1-3bc

164.31  
150.77  
140.11  
131.52  
128.93  
128.03  
126.02  
121.59  
77.33  
77.00  
76.68

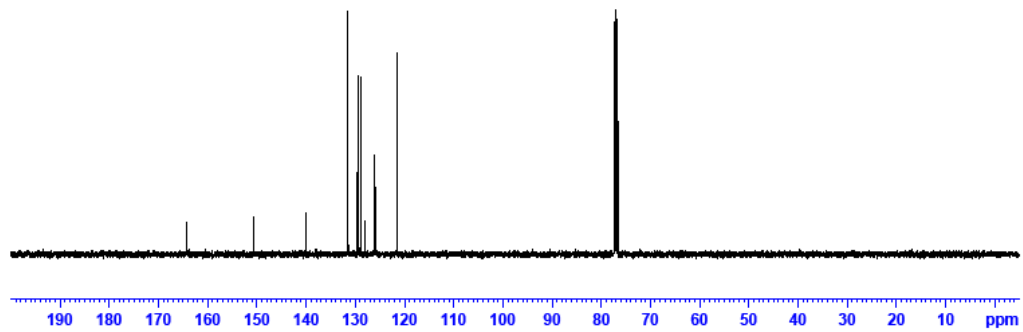

wj1-3c

8.253  
8.239  
8.230  
8.217  
7.462  
7.443  
7.422  
7.305  
7.287  
7.268  
7.260  
7.230  
7.227  
7.212  
7.208  
7.191  
7.169

0.012

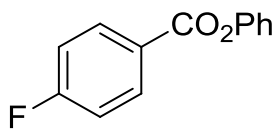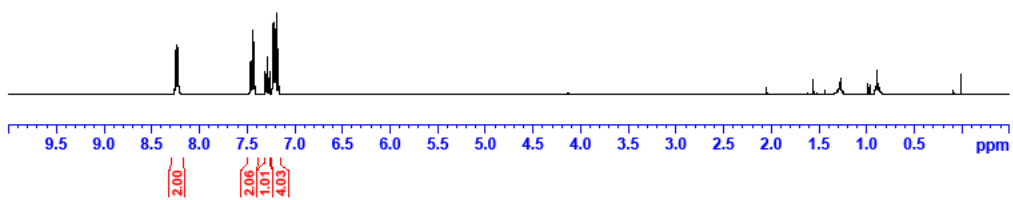

wj1-3cc

167.43  
164.19  
150.83  
132.92  
129.52  
129.51  
128.96  
125.81  
121.64  
115.88  
115.66  
77.32  
77.00  
76.88

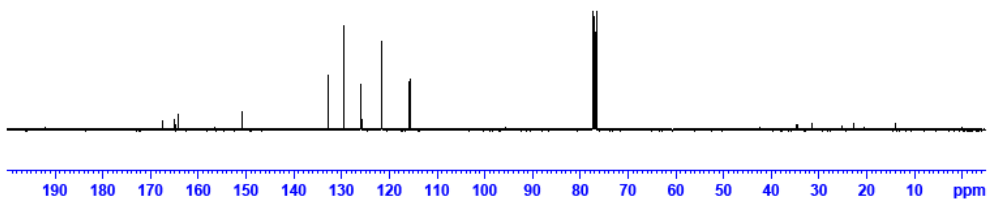

wjl-3cf

-104.45

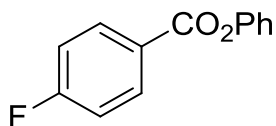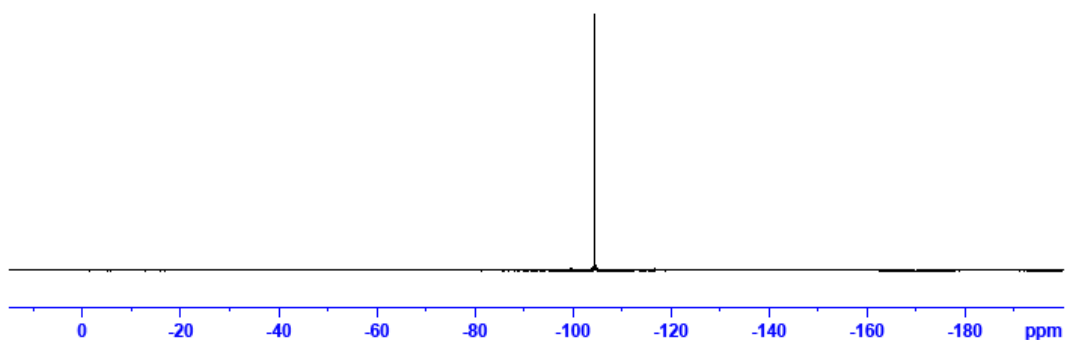

wjl-3d

8.023  
8.009  
8.005  
7.752  
7.749  
7.733  
7.729  
7.467  
7.463  
7.452  
7.449  
7.433  
7.428  
7.422  
7.408  
7.403  
7.389  
7.384  
7.313  
7.310  
7.307  
7.292  
7.288  
7.285  
7.281  
7.278  
7.273  
7.260

0.009

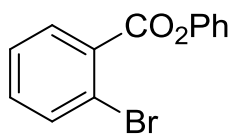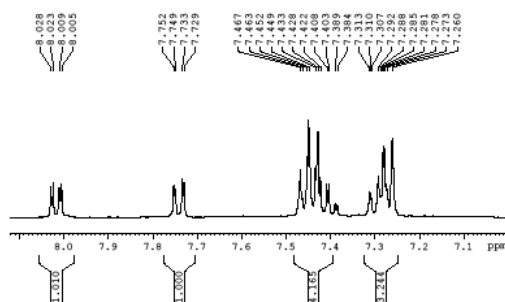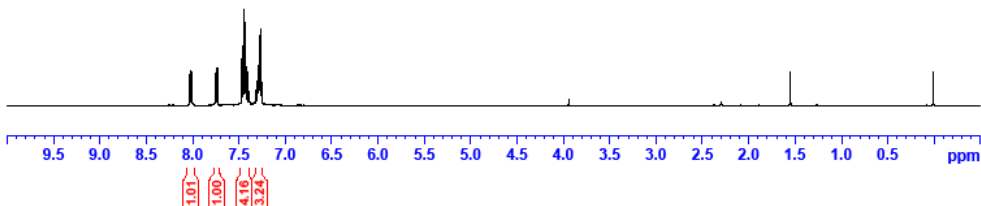

wj1-3dc

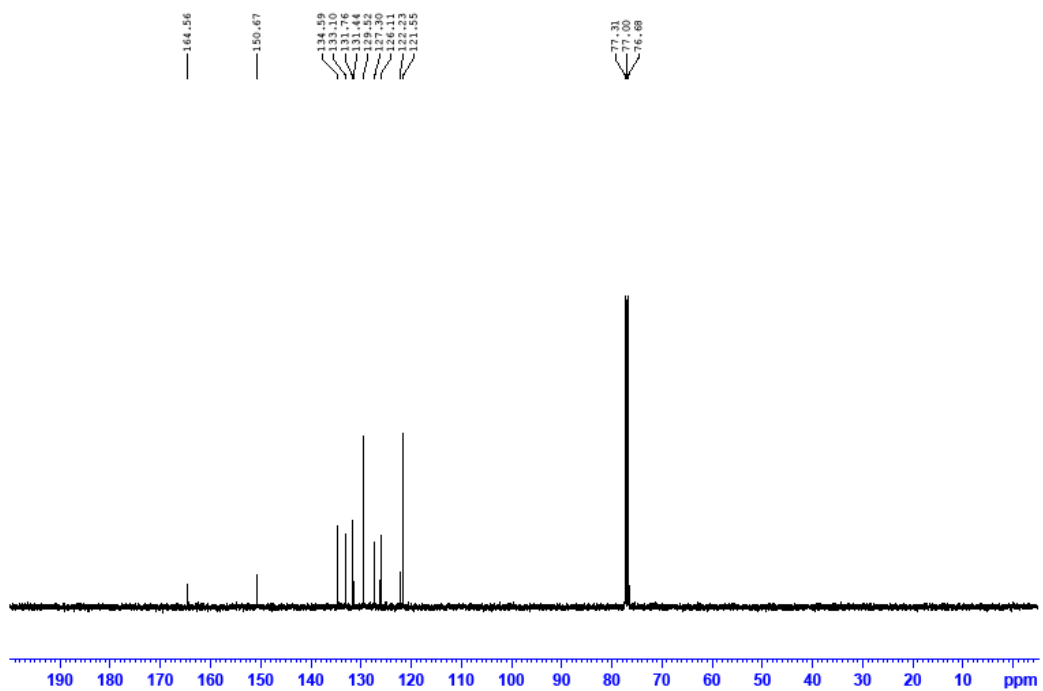

wj1-3e

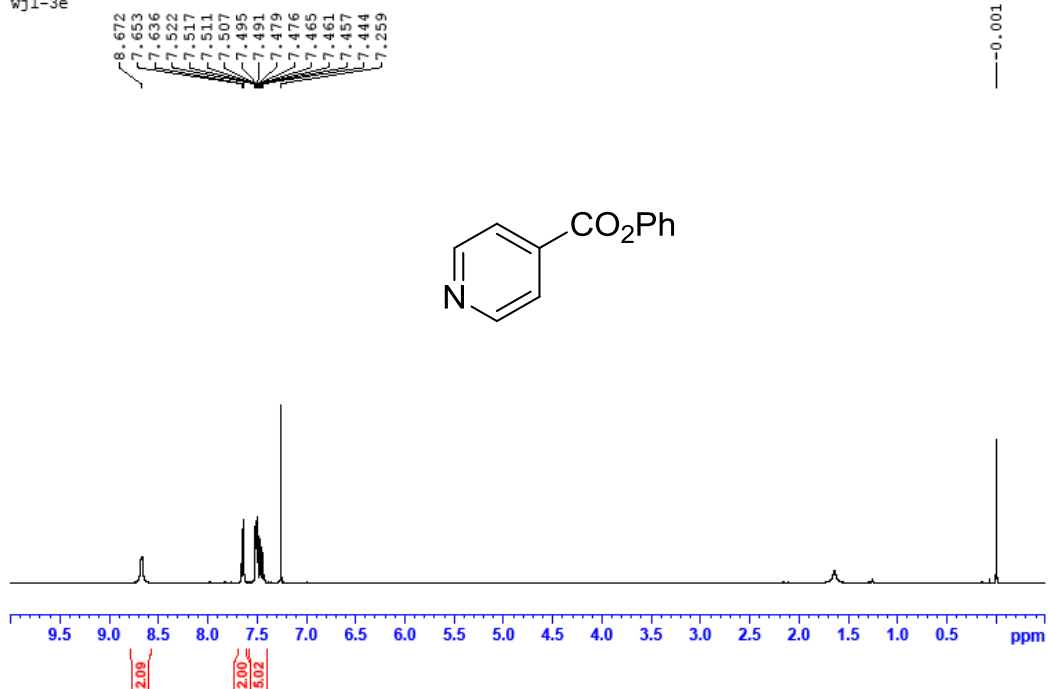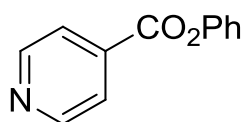

wj1-3ec

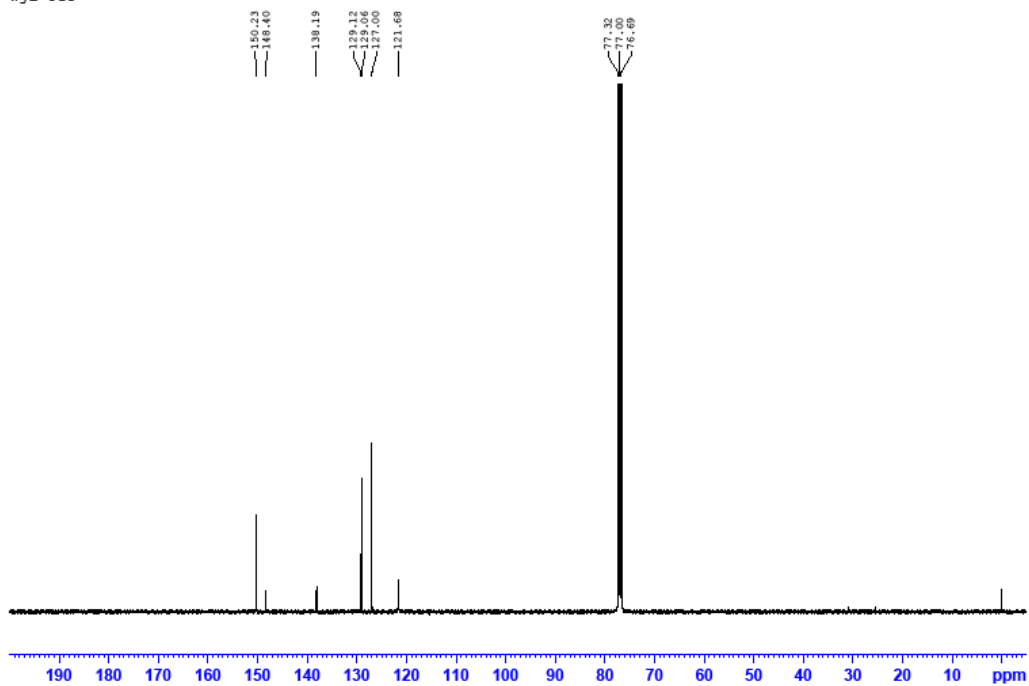

wj1-3f'

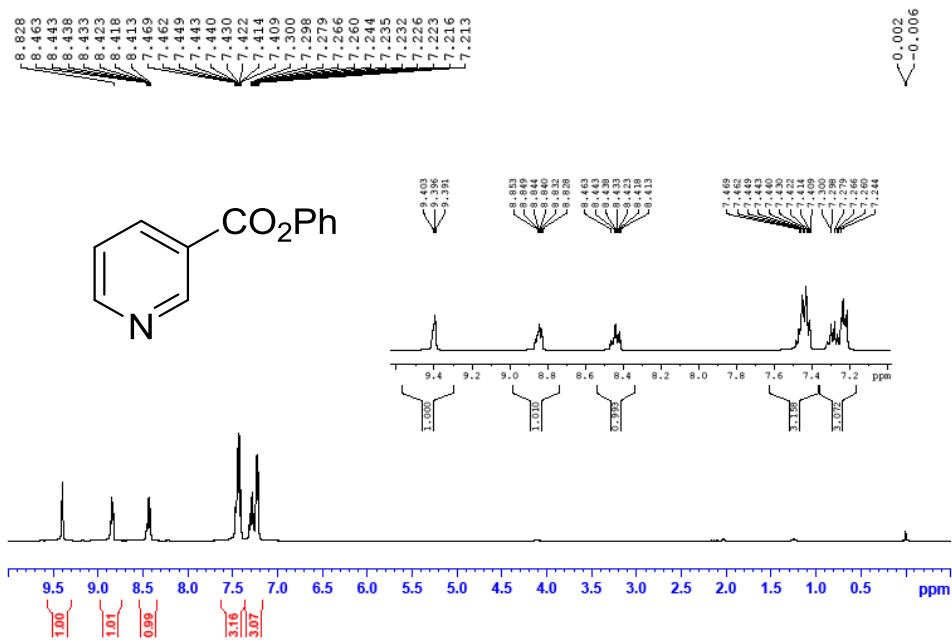



wj1-3f'c

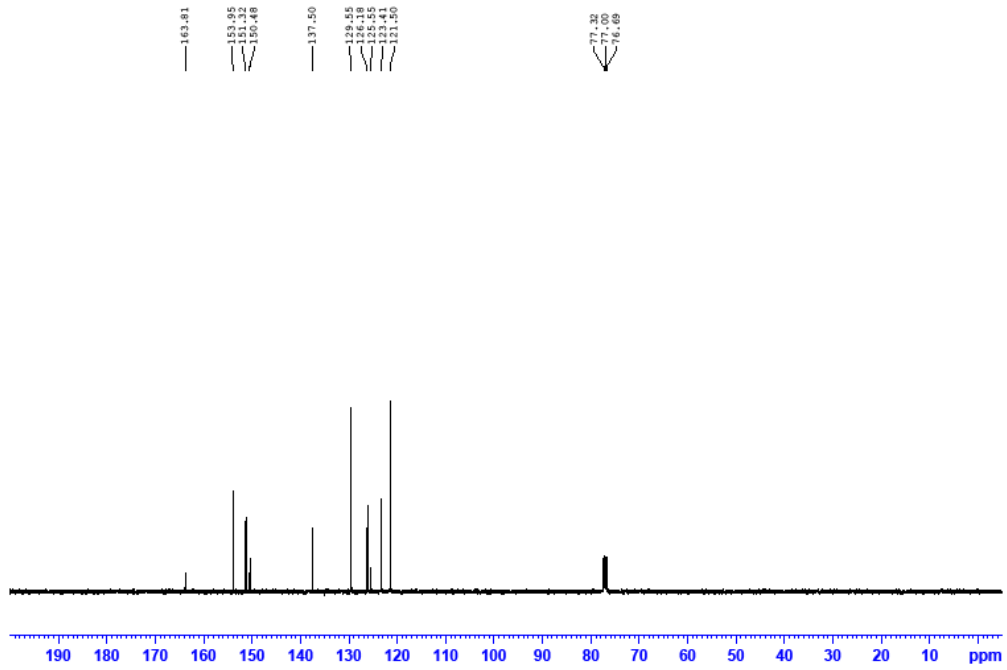

wj1-3g

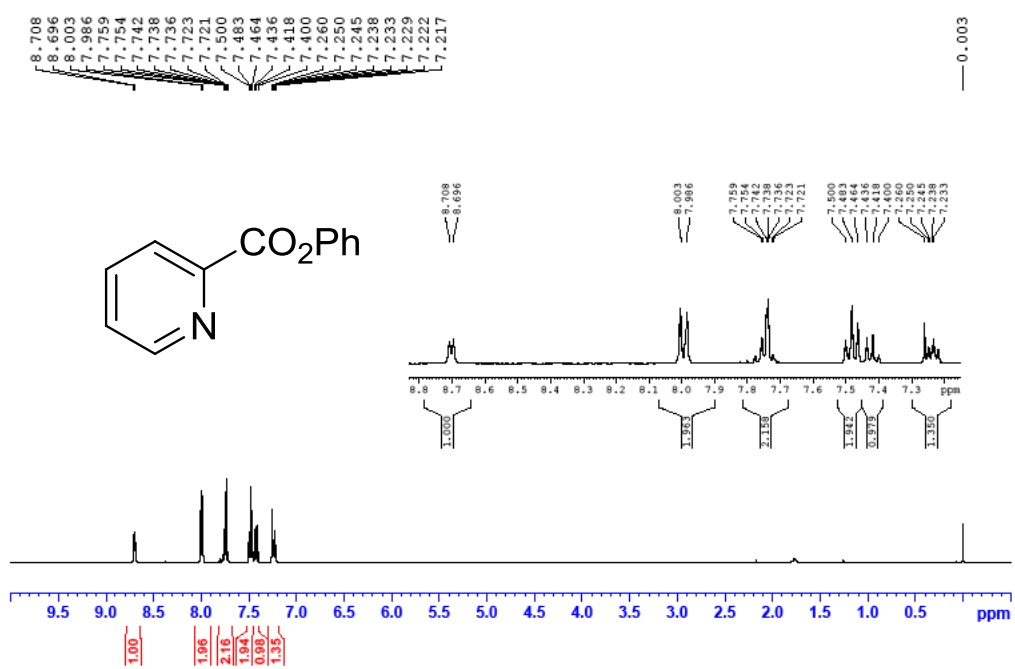

wj1-3gc

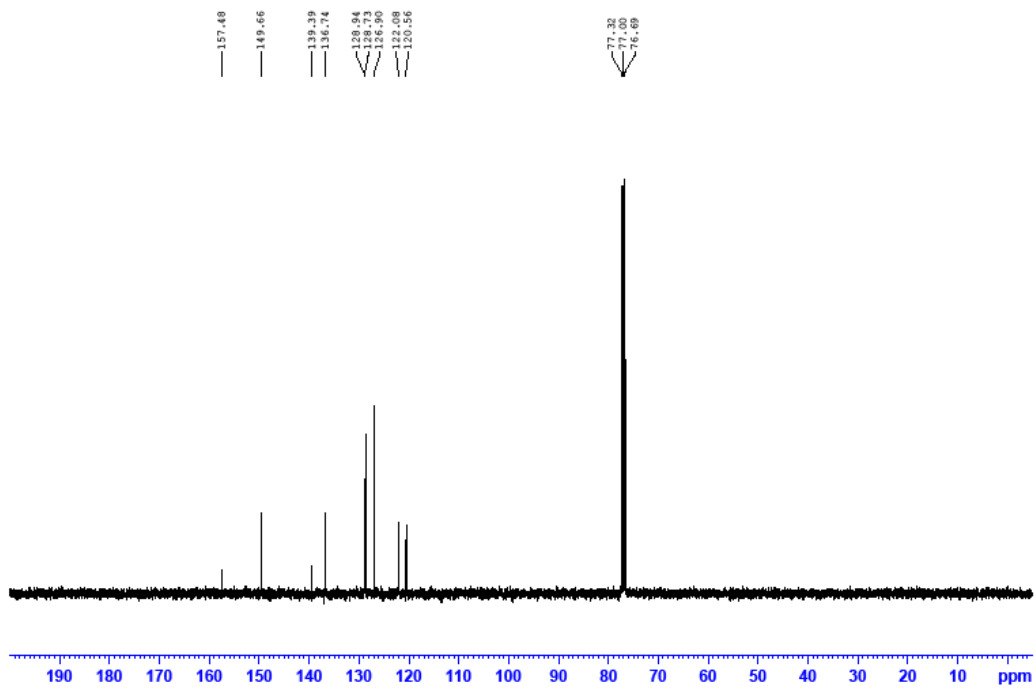

wj1-3h

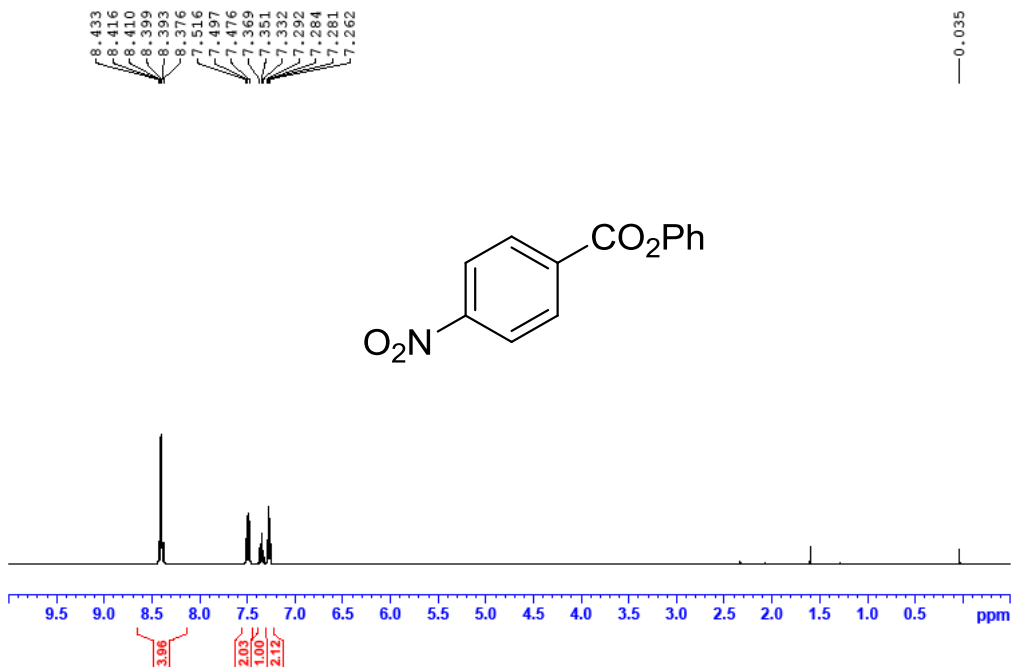

wj1-3hc

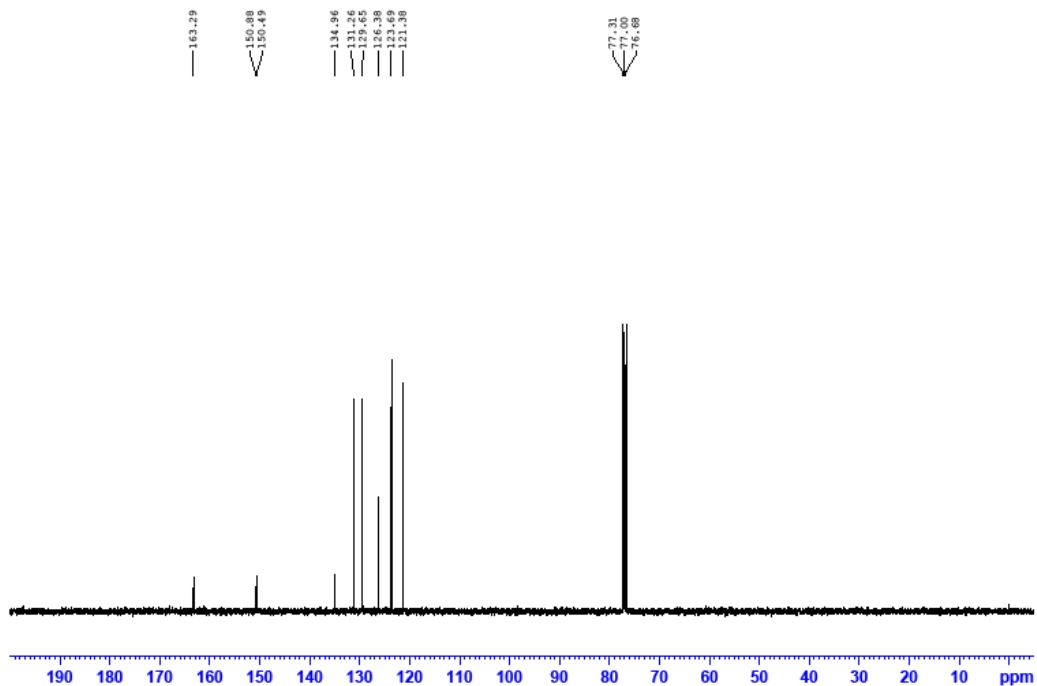

wj1-3i

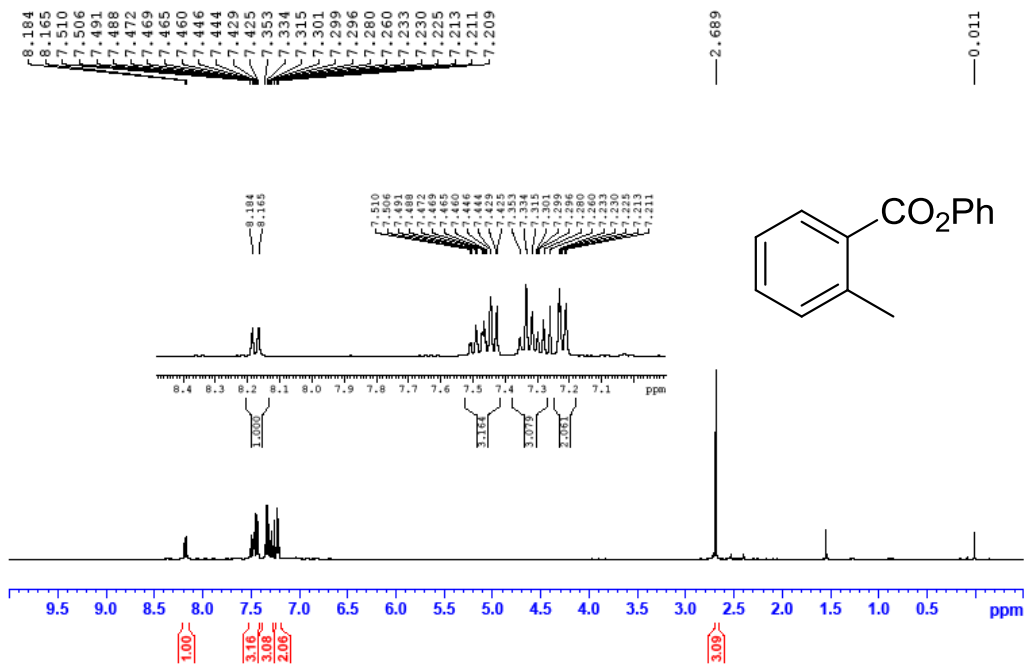

wj1-3ic

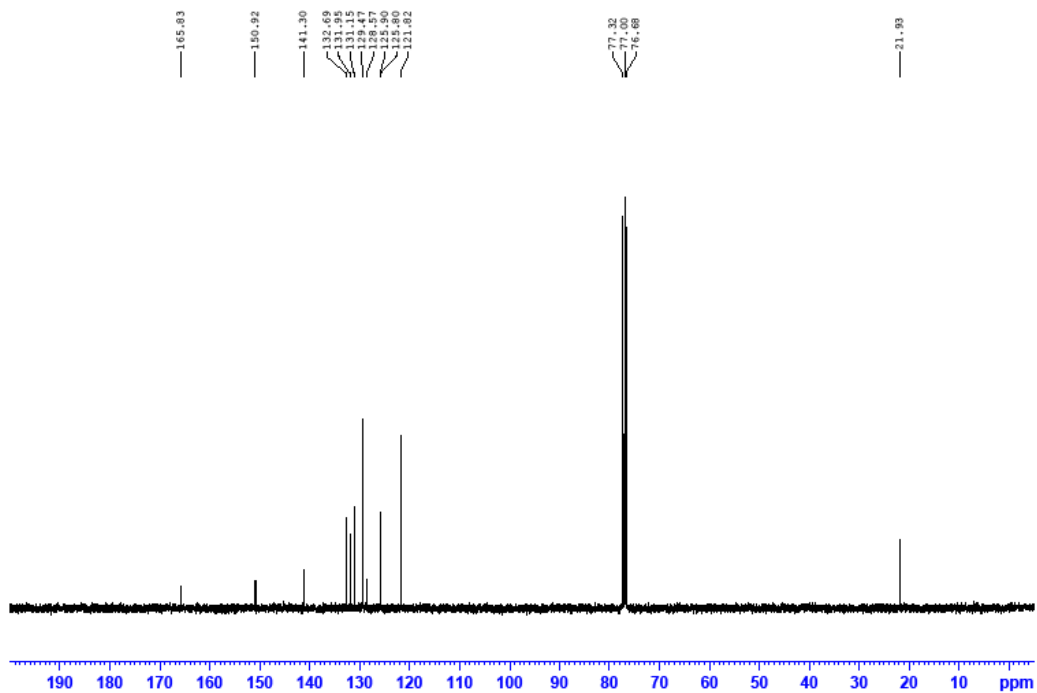

wj1-3j

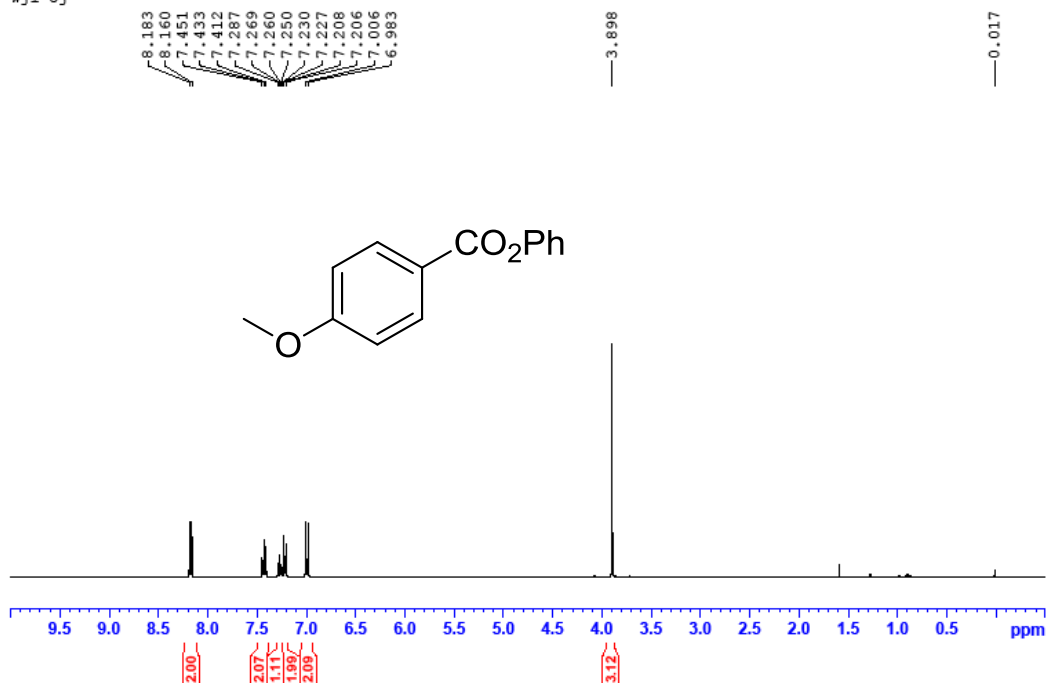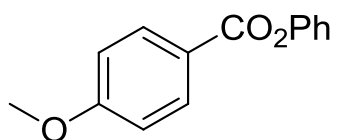

wj1-3jc

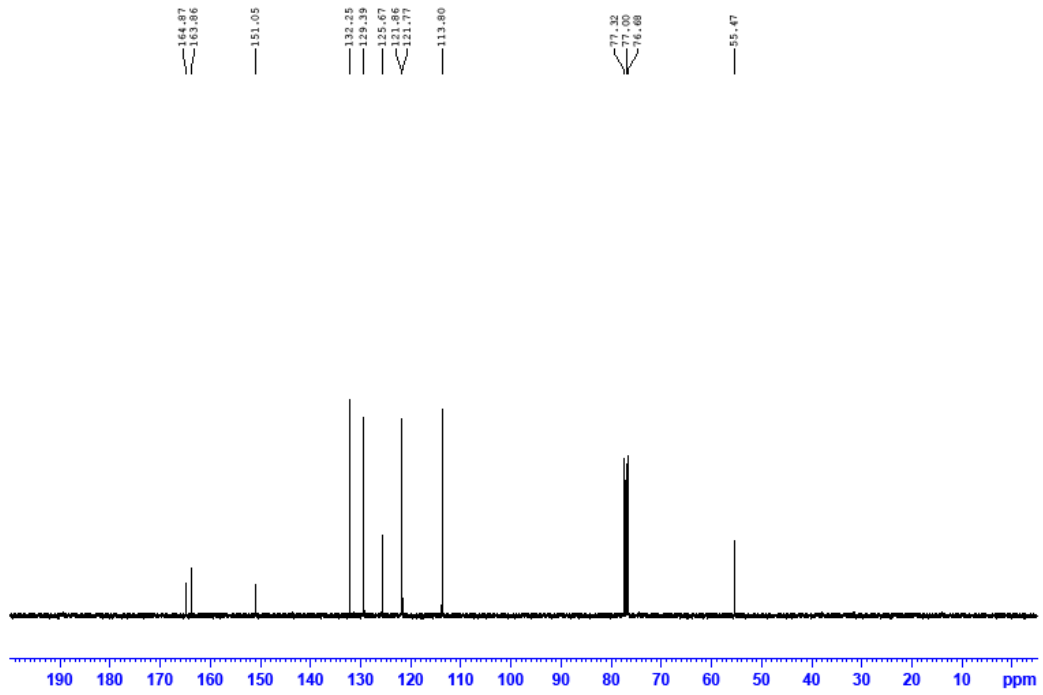

wj1-3L'

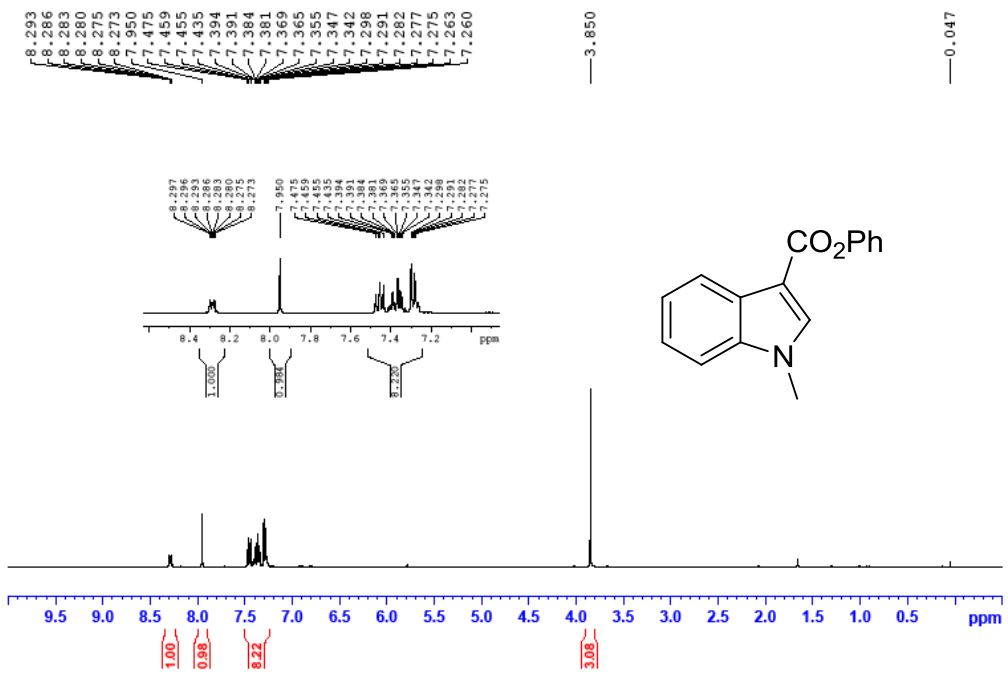

wj1-3L'c

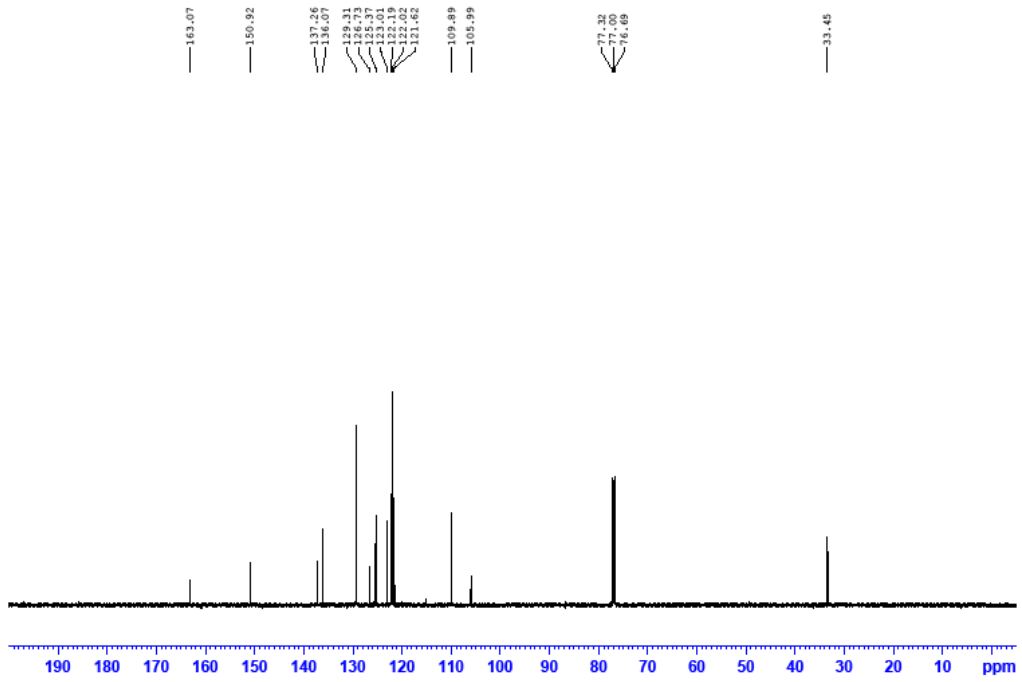

WJL891

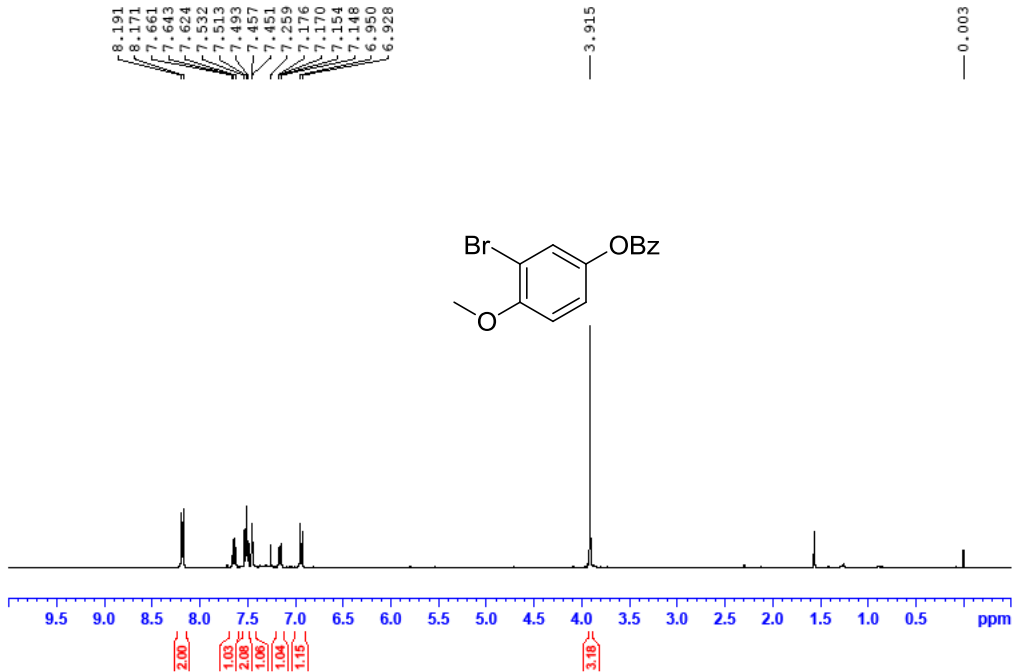

WJL891c

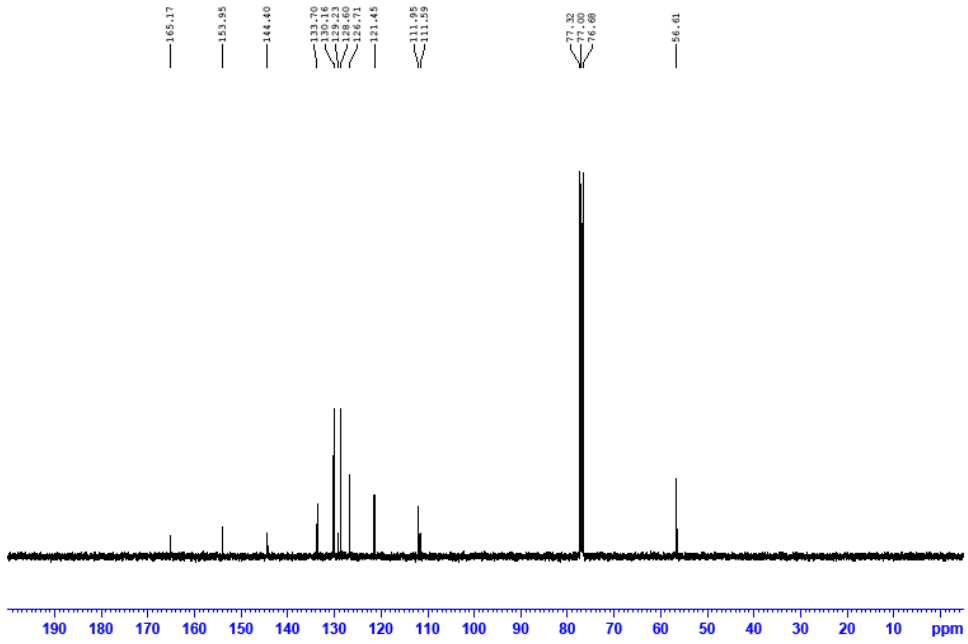

wj1907

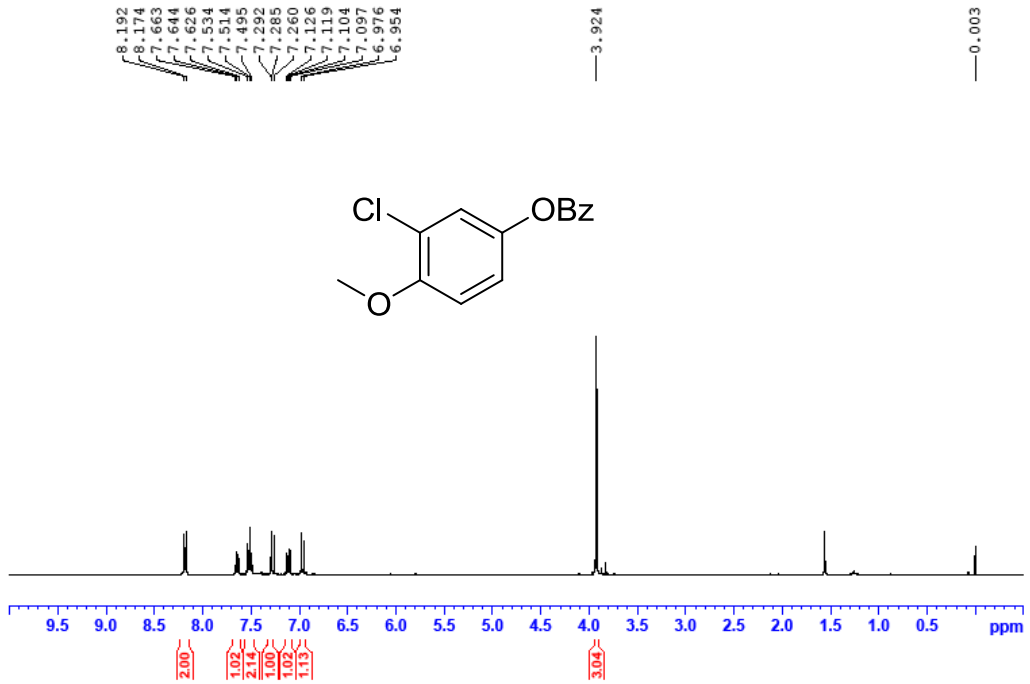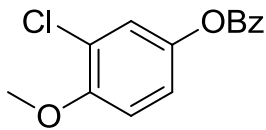

wj1907c

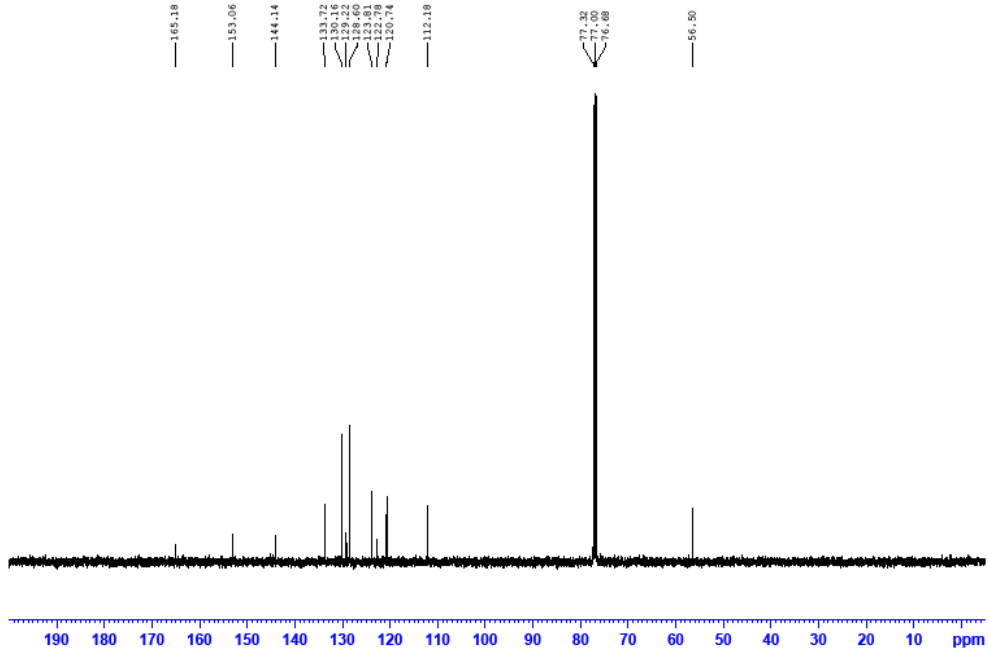

wj1906

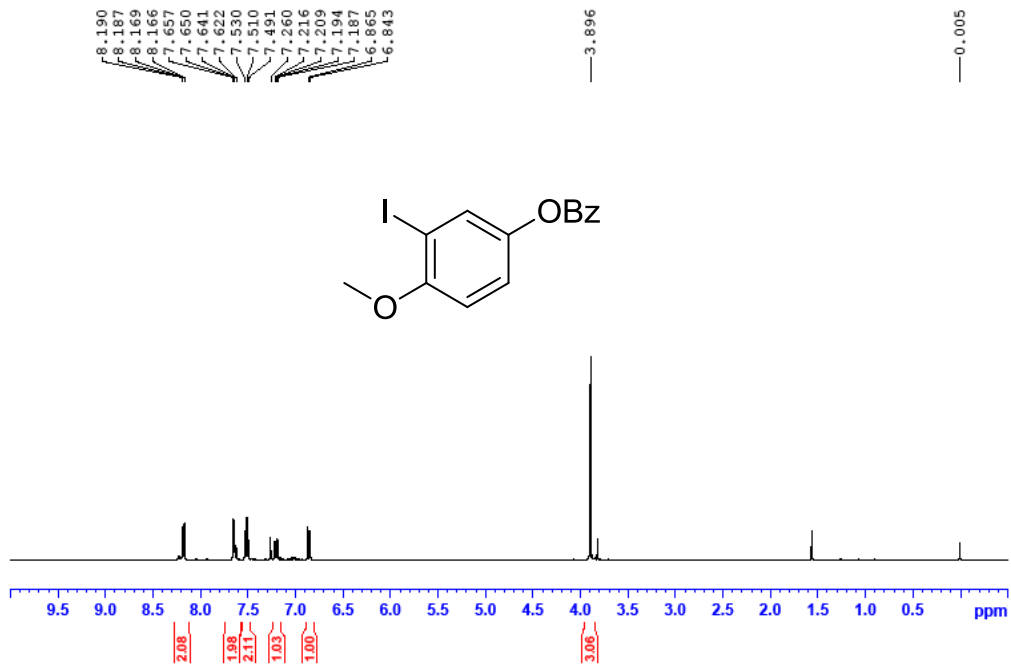



wj1906c

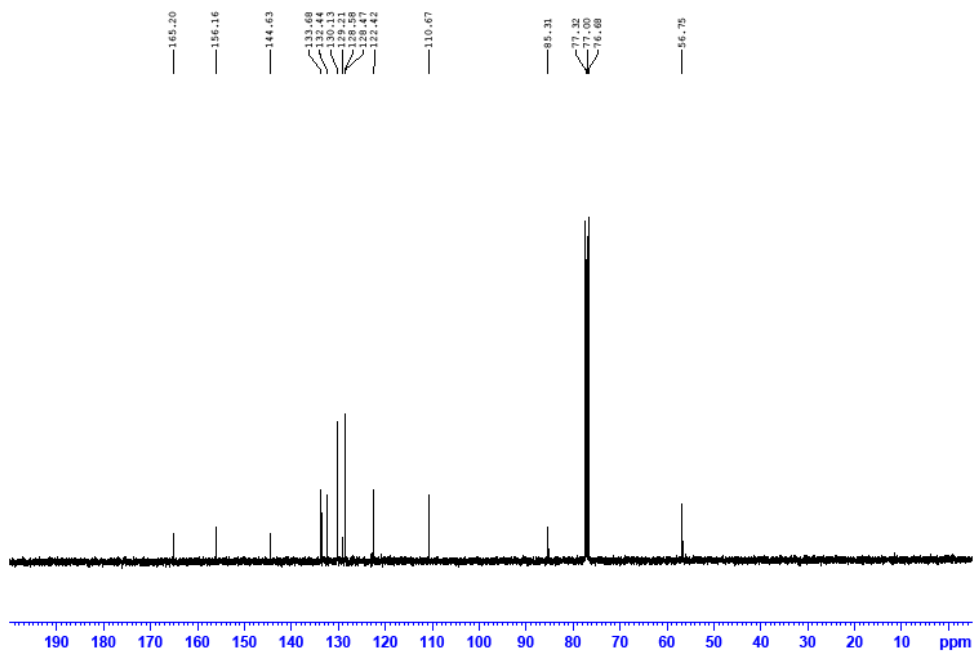

wj1-3pH

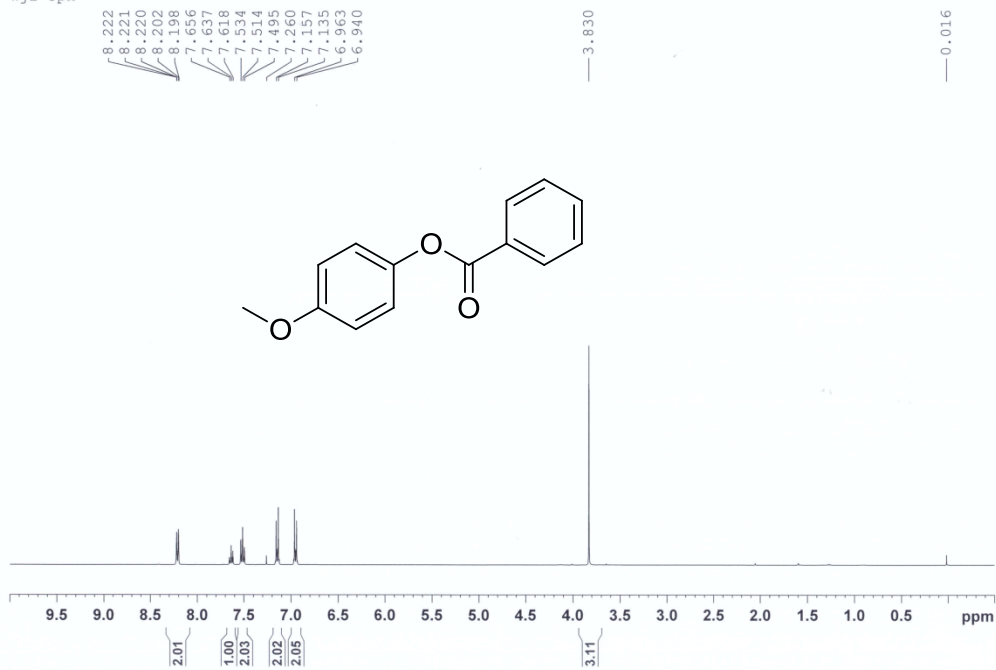

wj1-3pc

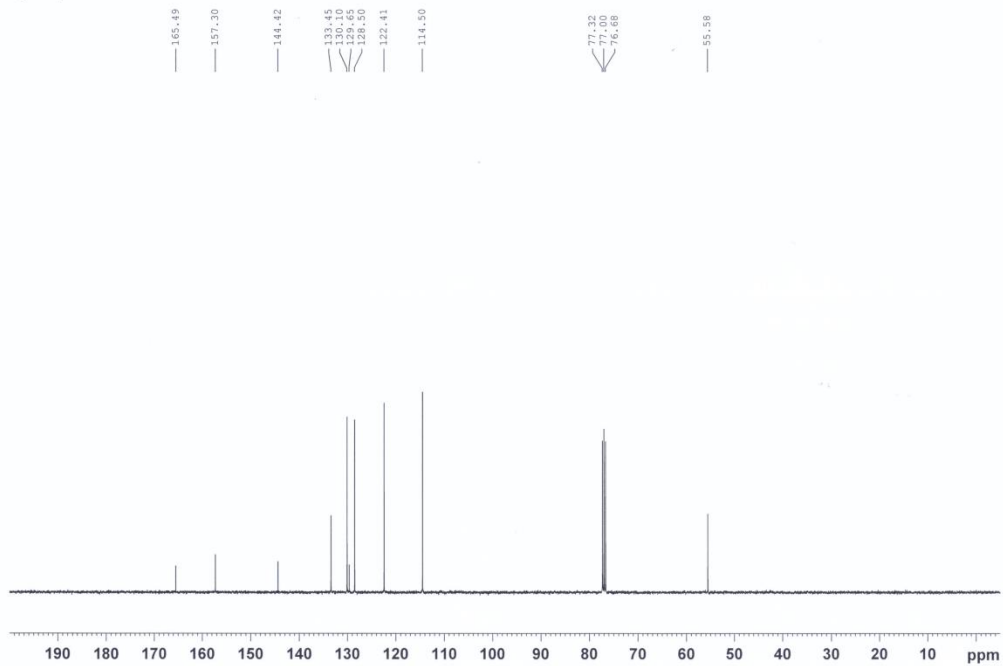

wj1-3q

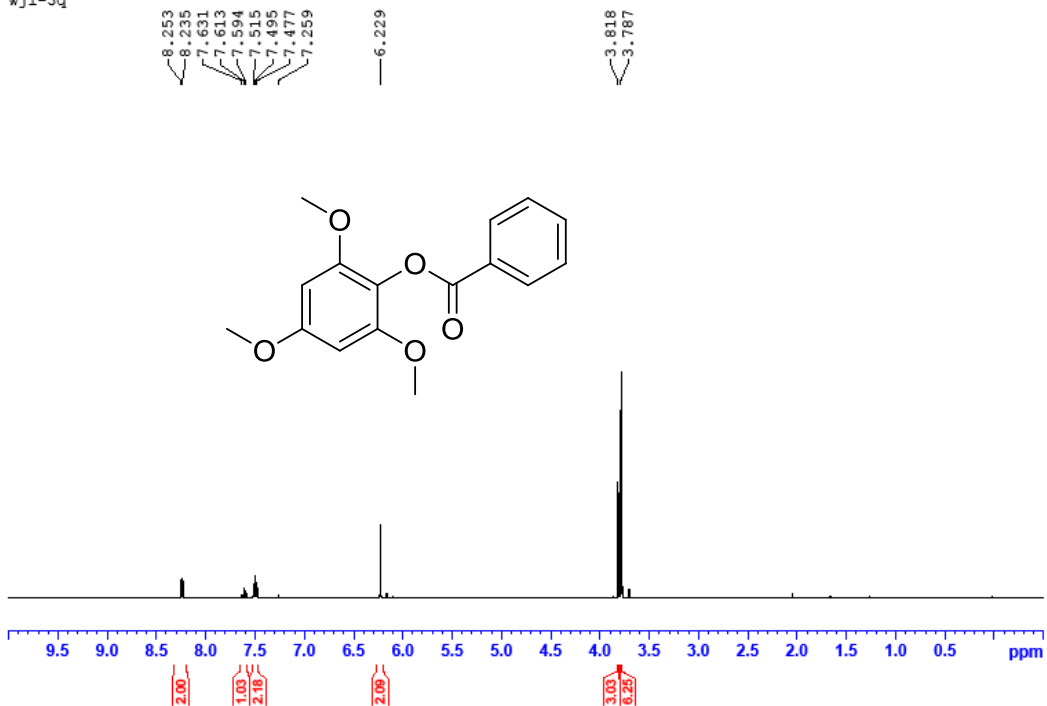

wj1-3qc

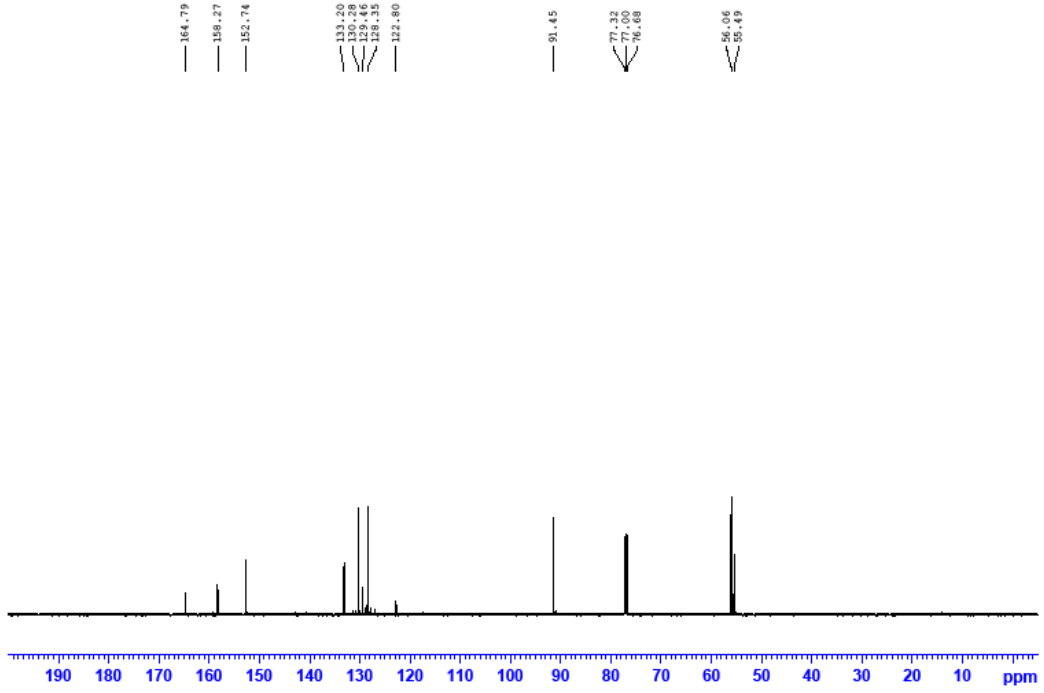

wj1842

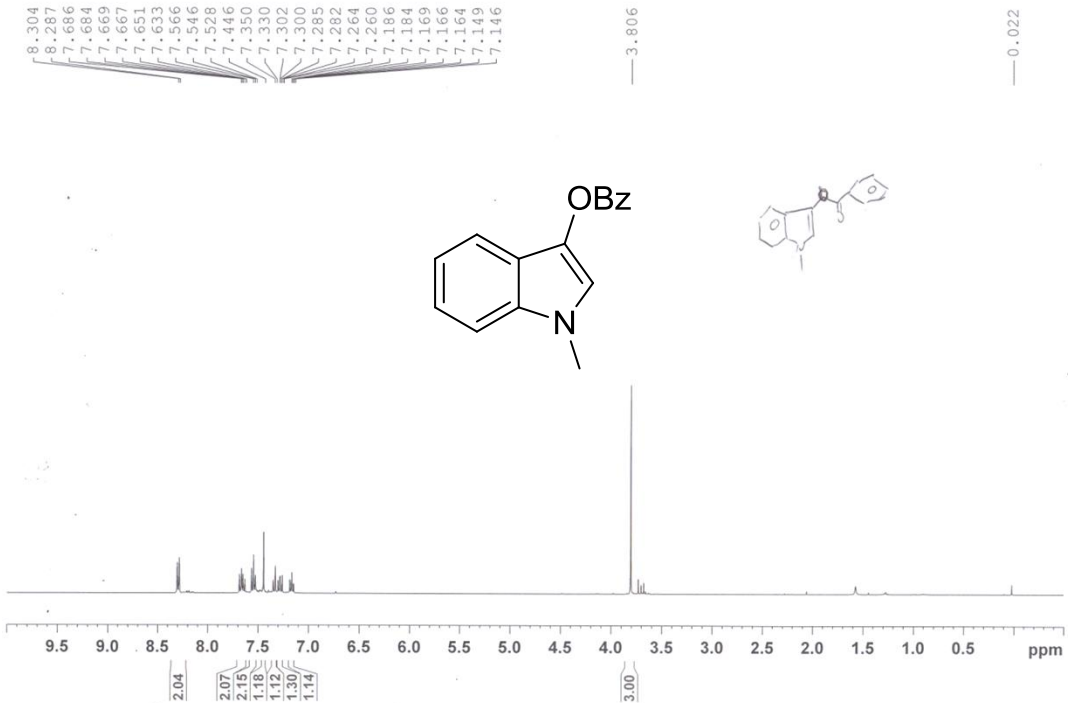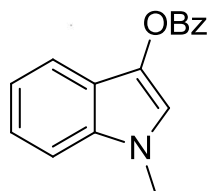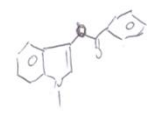

wj1842c

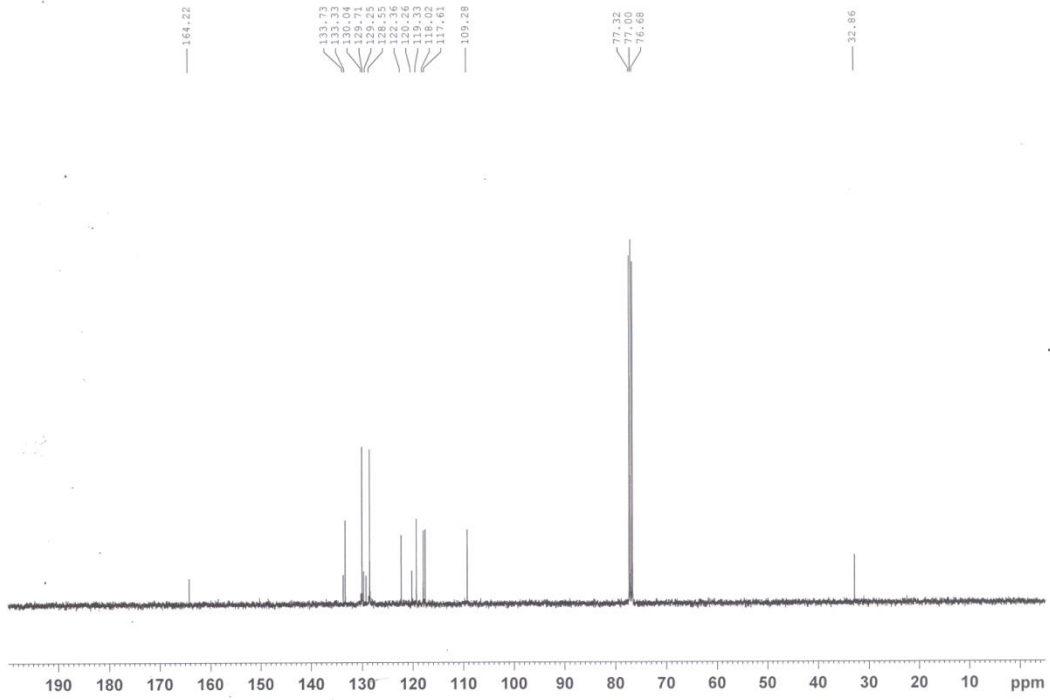

wj1901

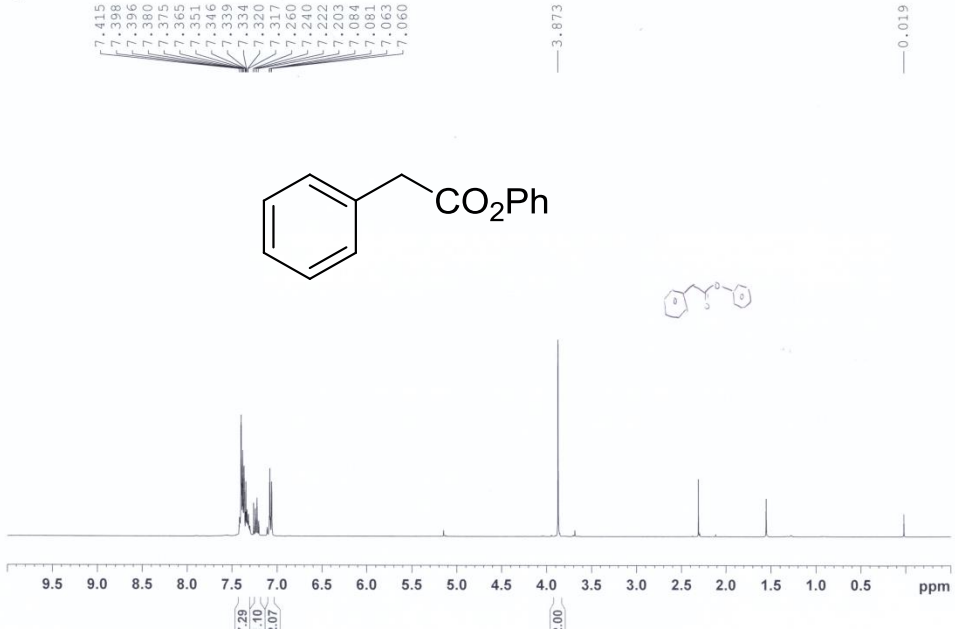

wj1901c

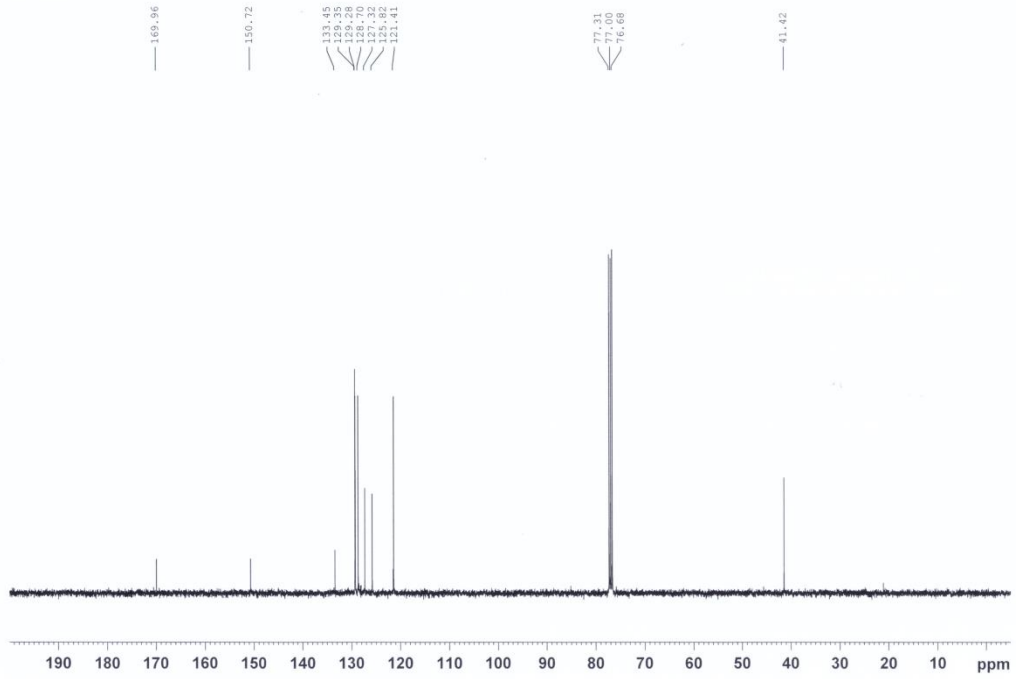

WJ1-KIE

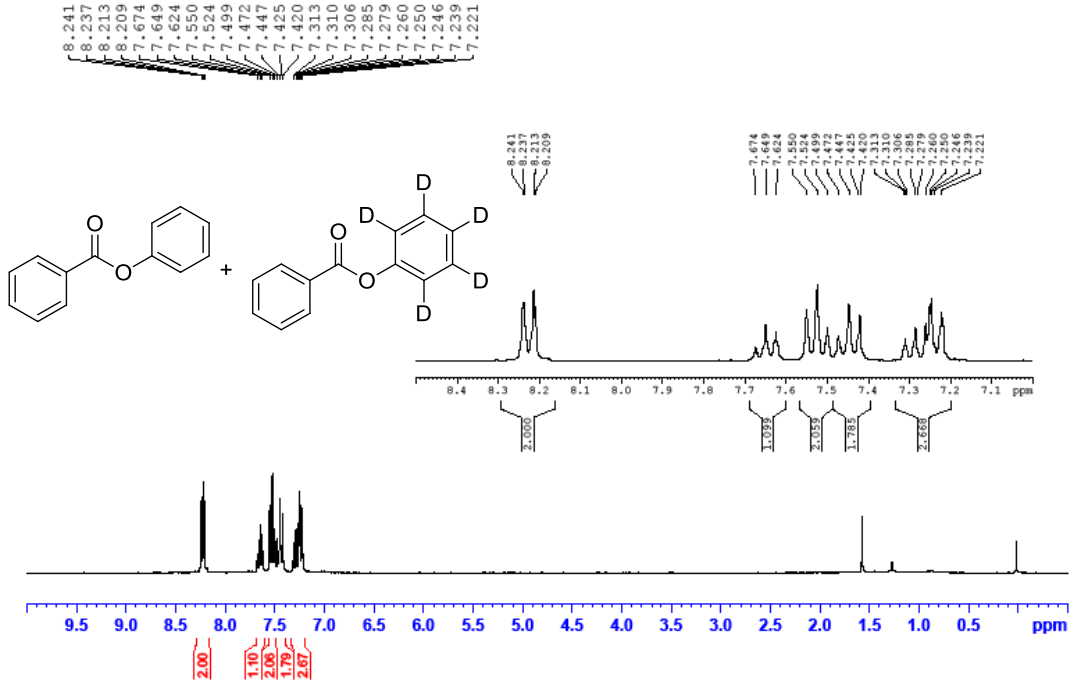

Supplement: c5qo00003c1.pdf [file c5qo00003c1.pdf]
